# Supplementary material
Source: publisher figshare collection journal article supplement (https://karger.figshare.com/ndownloader/files/35109475)
Supplement: Supplementary file 1 [file 35109475]

Anhang

*Cronbachs α für die LOT-R Subskalen Optimismus und Pessimismus in den verwendeten Übersetzungen*

| Sprache | Cronbachs *α* für die  Subskala Optimismus | Cronbachs *α* für die Subskala Pessimismus |
| --- | --- | --- |
| Arabisch (*n* = 159) | .74 | .54 |
| Englisch (*n* = 120) | .76 | .62 |
| Spanisch (*n* = 75) | .61 | .67 |
| Farsi (*n* = 18) | .84 | .63 |
| Französisch (*n* = 78) | .65 | .55 |
| Russisch (*n* = 23) | .69 | .65 |
| Tigrinya (*n* = 22) | .89 | .39 |
| Türkisch (*n* = 57) | .56 | .69 |

*Anmerkungen*. *N* = 552. 2 Personen füllten den Fragebogen auf Deutsch aus, aufgrund der geringen Anzahl wurden für die deutsche Version jedoch keine internen Konsistenzen berechnet. Die Übersetzungen auf Albanisch, Kurdisch und Urdu wurden nicht verwendet. In die Berechnung der LOT-R-Subskalen Optimismus und Pessimismus fließen jeweils drei Items ein.
